# Supplementary material
Source: PubMed Central journal article supplement (PMC3281680)
Supplement: supp_M111.312264_jbc.M111.312264-1.pdf [file supp_M111.312264_jbc.M111.312264-1.pdf]

## SUPPLEMENTAL DATA

**TABLE S1.** Characteristics of RA-FLS donors. DMARD: disease-modifying anti-rheumatic drug; FIMR: Feinstein Institute for Medical Research; n/a: information not available; NKJD: no known joint disease; NO: normal; NSAID: non-steroidal anti-inflammatory drug; RF: rheumatoid factor.

\* Patient met criteria from the American College of Rheumatology for the diagnosis of RA, but additional clinical data is not available.

| Donor | Diagnosis | Gender | Ethnicity | Age | Disease duration (years) | RF  | Medication(s)            | Origin   |
|-------|-----------|--------|-----------|-----|--------------------------|-----|--------------------------|----------|
| RA-a  | RA        | Female | Caucasian | 39  | 3                        | +   | NSAID                    | Asterand |
| RA-b  | RA        | Male   | Caucasian | 48  | 10                       | +   | Prednisone               | Asterand |
| RA-c  | RA        | Male   | Hispanic  | 48  | <1                       | +   | Prednisone, DMARD        | Asterand |
| RA-d  | RA        | Female | Caucasian | 56  | <1                       | +   | NSAID                    | Asterand |
| RA-e  | RA        | Female | Caucasian | 51  | 12                       | +   | NSAID                    | Asterand |
| RA-f  | RA        | Female | Hispanic  | 66  | 2                        | +   | Prednisone, DMARD, NSAID | FIMR     |
| RA-g  | RA        | Female | Caucasian | 68  | 11                       | +   | DMARD                    | FIMR     |
| RA-h  | RA        | Male   | Caucasian | 80  | 15                       | +   | Prednisone, DMARD        | FIMR     |
| RA-i  | RA        | Female | Caucasian | 58  | 21                       | +   | Prednisone, DMARD        | FIMR     |
| RA-j  | RA        | Female | Caucasian | 60  | 30                       | +   | Prednisone, DMARD        | FIMR     |
| RA-k  | RA        | Female | Caucasian | 68  | 5                        | -   | DMARD                    | FIMR     |
| RA-l* | RA        | -      | -         | -   | -                        | n/a | -                        | FIMR     |
